# Supplementary material
Source: Springer Nature journal article supplement (https://www.springermedizin.de/resource/supplementary/12961_2013_307_MOESM3_ESM.pdf/9571104)
Supplement: MOESM3 [file 9571104]

Pre-SI

## I. Dispersed Global Health Research Community

Individuals with a wealth of human capital and pre-existing connections

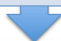

SI F2F

## II. Networking Opportunity

**Exchange of Human & Social Capital**

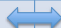

**Social Interaction**

Exposure to new knowledge, opportunities and resources

Build new relationships and strengthen existing connections. Build trust and understanding

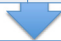

Post-SI

## III. Maintain and Use Contacts (Participate in Network)

**Academic/Professional Dimensions**

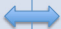

**Interpersonal dimensions**

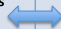

**Network Develops**

Collaborate; use new knowledge, opportunities and resources; clarify career goals

Social support and mentorship; decreased isolation

Network grows and is strengthened through increased interconnections

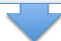

## IV. Outcomes

**Individual Career Benefits**

Higher performance<sup>[1]</sup>, enhanced job satisfaction<sup>[14]</sup>. Increased outputs and GHR competencies

**Dynamic Network**

Sense of belonging, ownership and understanding<sup>[1]</sup>. Social support and mentorship

**More equitable capacity for GHR**

Knowledge, skills and resources shared across network. Greater dissemination and use of research<sup>[2]</sup>
